# Supplementary material
Source: PubMed Central journal article supplement (PMC3811683)
Supplement: MCB.00403-13_zmb999100151so4.pdf [file MCB.00403-13_zmb999100151so4.pdf]

## Supplemental material

### Abbreviations:

CPT, camptothecin; CTD, C-terminal domain; DRB, 5,6-dichloro-1- $\beta$ -D-ribobenzimidazole; DSBs, double-strand breaks; etoposide, 4'-demethylepipodophyllotoxin ethylidene- $\beta$ -D-glucoside; pMEFs, primary mouse embryonic fibroblasts; MG132: carbobenzoxy-L-leucyl-L-leucyl-L-leucinal; RNAPII, RNA polymerase II; RNAPII LS, the large subunit of RNA polymerase II; Ser2-P, serine-2 phosphorylated; Ser5-P, serine-5 phosphorylated; SSB, single-strand breaks; t-AML, therapy-related acute myeloid leukemia; Top1, topoisomerase I; Top2, topoisomerase II; Ub, ubiquitin.

### Supplemental Figure Legend

**Fig. S1 (A)** Over-expression of UBA domain of Rad23 ( $\Delta$ UBL) did not abolish VP-16-induced Top2 $\beta$  degradation. HeLa cells were transfected with the plasmid (pcDNA3) expressing truncated Rad23  $\Delta$ UBA or  $\Delta$ UBL. Empty vector served as a vehicle control. Cells were then treated with 250  $\mu$ M VP-16 or 25 $\mu$ M CPT for time periods as indicated. Cell lysates were prepared and immunoblotted with anti-Top1, Top2 $\beta$  or  $\alpha$ -tubulin antibody. CPT-induced Top1 degradation served as positive control for Ub-dependent degradation (24). **(B)** siRNA-mediated silencing of PA28 $\gamma$  regulatory particle does not impact VP-16-induced degradation of Top2 $\beta$ . HeLa cells were transfected with control or PA28 $\gamma$  siRNA. 72 hrs post-transfection, cells were treated with 250  $\mu$ M VP16 or 25  $\mu$ M CPT in the presence or absence of proteasome inhibitor MG132 for time periods as indicated. Cell lysates were immunoblotted with anti-Top1, Top2 $\beta$  or  $\alpha$ -tubulin antibody. Silencing of PA28 $\gamma$  was evaluated by immunoblotting against PA28 $\gamma$  protein.

**Fig. S2 (A)** The knockdown efficiencies of 19S siRNAs were evaluated by the decrease of its corresponding protein. HeLa cells were transfected with control, Rpt5, Rpt6, Rpn2, Rpn11 or S5a siRNA. 72 hrs post-transfection, cell lysates were immunoblotted with anti-Rpt5, Rpt6, Rpn2, Rpn11 or S5a antibody. **(B)** The knockdown efficiencies of 19S siRNAs were further confirmed by the accumulation of Ub-conjugates in whole cell lysates. HeLa cells were transfected with control, Rpt5, Rpt6, Rpn2, Rpn11 or S5a siRNA. 72 hrs post-transfection, cell lysates with same protein concentration were immunoblotted with anti-Ub antibody.

**Fig. S3** A model that schematically depicts the two different polarities of the Top1 roadblock and the subsequent responses of RNAPII.
