# Supplementary material
Source: PubMed Central journal article supplement (PMC3811683)

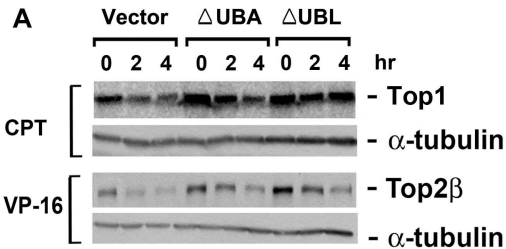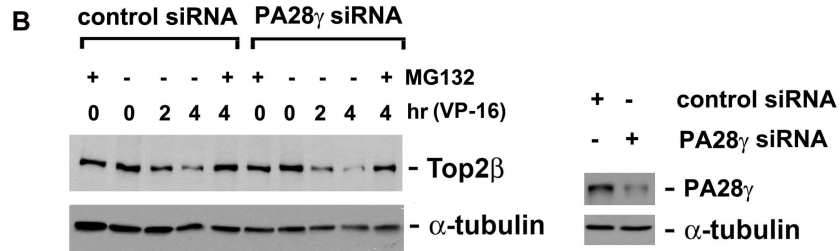

Supplement: MCB.00403-13_zmb999100151so1.pdf [file MCB.00403-13_zmb999100151so1.pdf]

**A**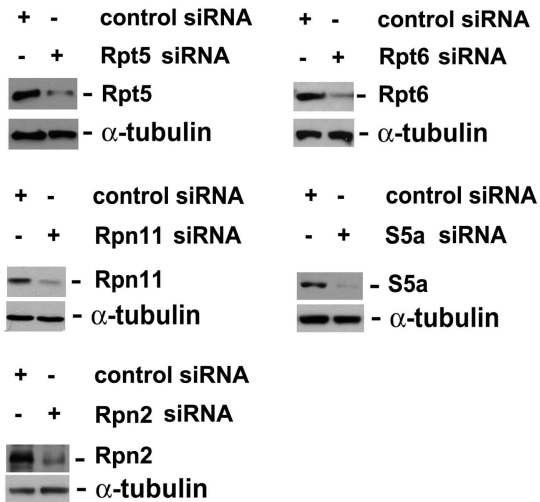**B**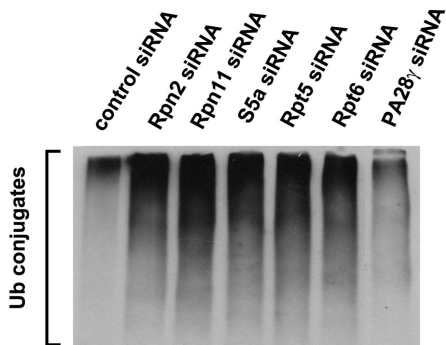

Supplement: MCB.00403-13_zmb999100151so2.pdf [file MCB.00403-13_zmb999100151so2.pdf]

### A. Top1-DNA cleavage complex on coding Strand

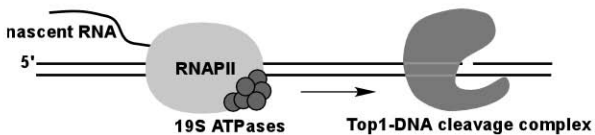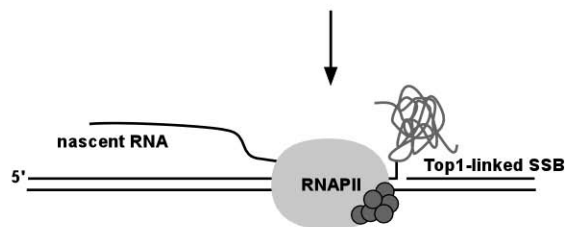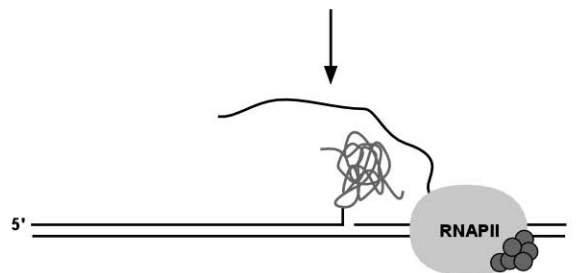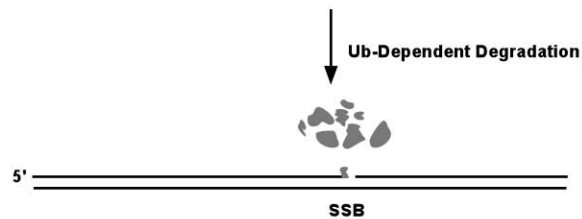

### B. Top1-DNA cleavage complex on template strand

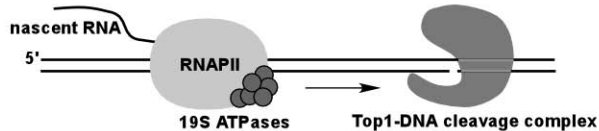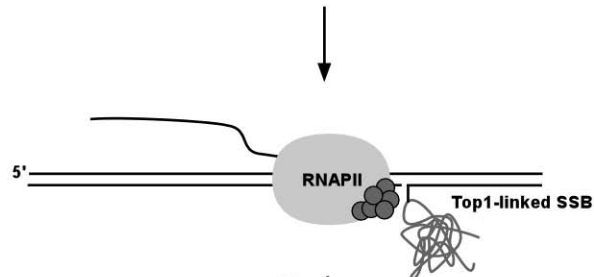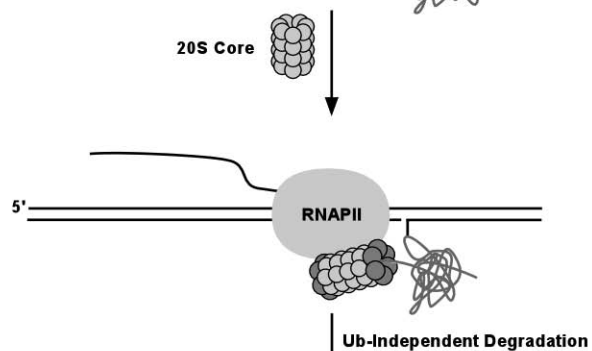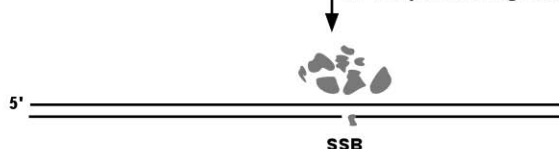

Supplement: MCB.00403-13_zmb999100151so3.pdf [file MCB.00403-13_zmb999100151so3.pdf]
